# Supplementary material for: First Chemical Investigation of Korean Wild Mushroom, Amanita hemibapha subsp. javanica and the Identification of Anti-Helicobacter pylori Compounds
Source: MDPI journal article supplement (doi:10.3390/ph15020152), 2022-01-27
Supplement: s1 [file s1]

## Supplementary Materials

# **First Chemical Investigation of Korean Wild Mushroom, *Amanita hemibapha* subsp. *javanica* and the Identification of Anti-*Helicobacter pylori* Compounds**

Seulah Lee <sup>1,2</sup>, Akida Alishir <sup>1</sup>, Tae Wan Kim <sup>1</sup>, Dong-Min Kang <sup>3</sup>, Rhim Ryoo <sup>4</sup>, Changhyun Pang <sup>5</sup>, Mi-Jeong Ahn <sup>3</sup>, and Ki Hyun Kim <sup>1,\*</sup>

<sup>1</sup> School of Pharmacy, Sungkyunkwan University, Suwon 16419, Korea; seulah@kopri.re.kr (S.L.); akida.alishir@gmail.com (A.A.); asde8282@naver.com (T.W.K.)

<sup>2</sup> Division of Life Sciences, Korea Polar Research Institute, KIOST, Incheon, 21990, Korea

<sup>3</sup> College of Pharmacy and Research Institute of Pharmaceutical Sciences, Gyeongsang National University, Jinju 52828, Korea; kdm7105@gnu.ac.kr (D.M.K.); amj5812@gnu.ac.kr (M.J.A.)

<sup>4</sup> Special Forest Products Division, Forest Bioresources Department, National Institute of Forest Science, Suwon 16631, Korea; rryoo@korea.kr (R.R.)

<sup>5</sup> School of Chemical Engineering, Sungkyunkwan University, Suwon 16419, Korea; chpang@skku.edu (C.P.)

\* Correspondence: khkim83@skku.edu (K.H.K.); +82-31-290-7700 (K.H.K.)

## List of Supplementary Materials

|                                                                                                                               |    |
|-------------------------------------------------------------------------------------------------------------------------------|----|
| <b>Figure S1.</b> HR-ESIMS data of <b>1</b> .....                                                                             | 3  |
| <b>Figure S2.</b> <sup>1</sup> H NMR spectrum of <b>1</b> (CD <sub>3</sub> OD, 800 MHz).....                                  | 4  |
| <b>Figure S3.</b> EIC of LC/MS data of acylated derivative from CEA reaction of <b>1</b> .....                                | 5  |
| <b>Table S1.</b> HPLC chromatogram for the identification of compounds <b>1-10</b> .....                                      | 6  |
| <b>Table S2.</b> LC-MS identification of compounds <b>1-10</b> .....                                                          | 7  |
| <i>General experimental procedures</i> .....                                                                                  | 8  |
| <b>Figure S4.</b> The separation scheme of compounds <b>1-10</b> .....                                                        | 9  |
| <b>Table S3.</b> Anti- <i>H. pyroli</i> activity of the MeOH extract and fractions derived from the solvent partitioning..... | 10 |

Figure S1. HR-ESIMS data of 1

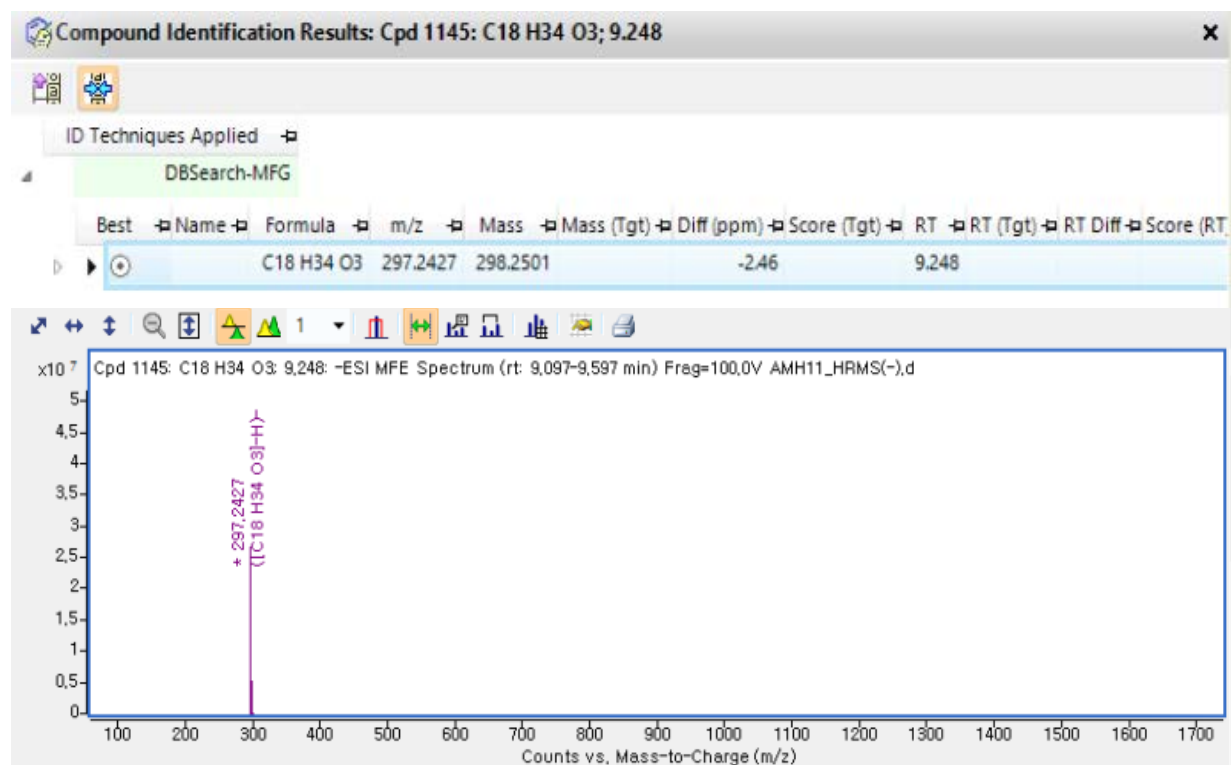

**Figure S2.**  $^1\text{H}$  NMR spectrum of **1** ( $\text{CD}_3\text{OD}$ , 800 MHz)

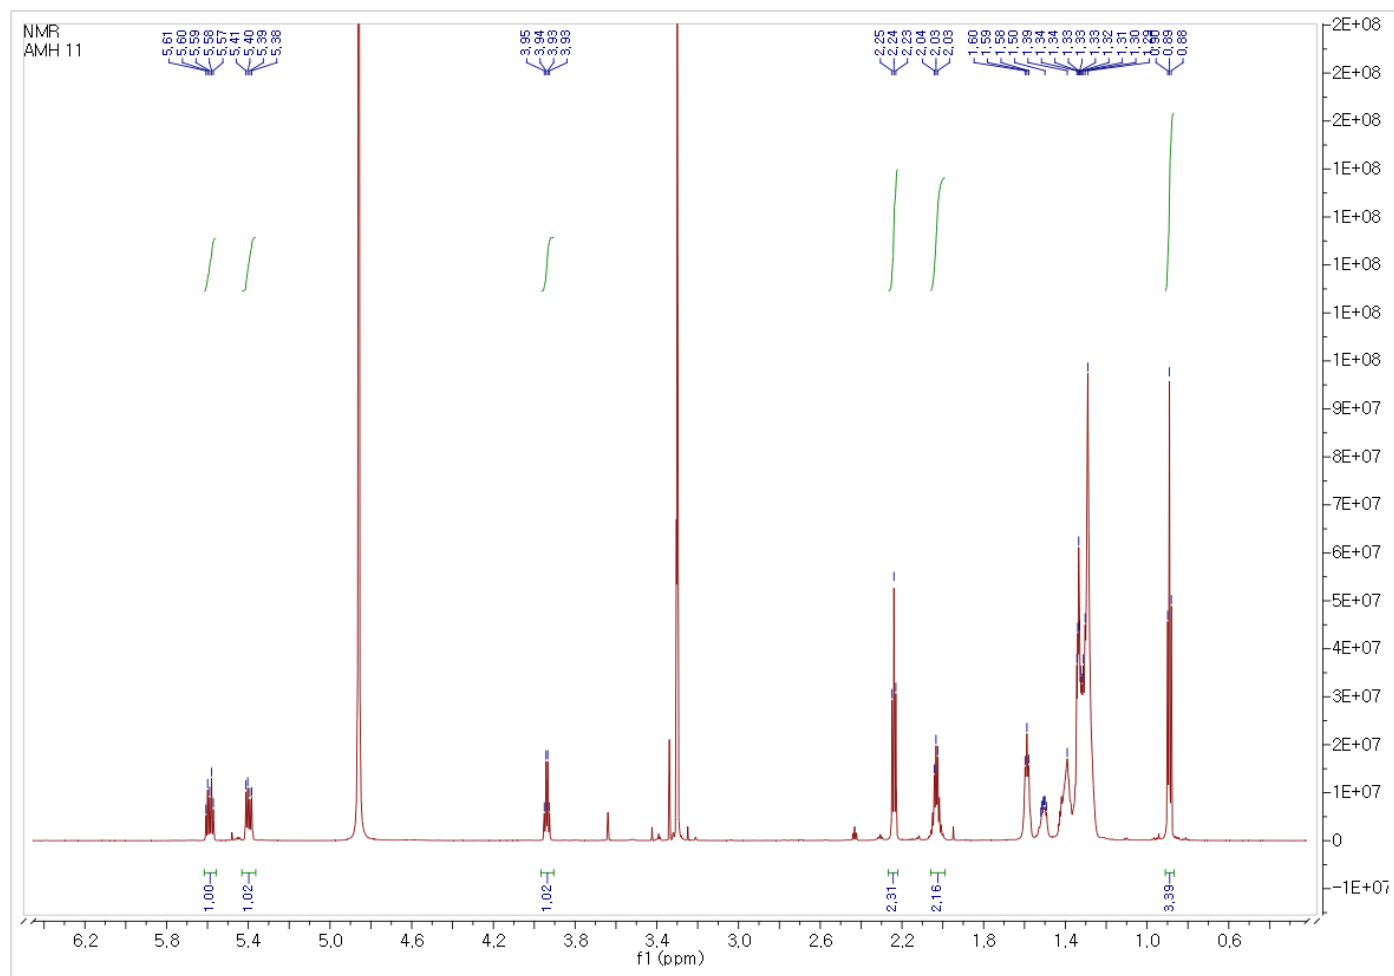

**Figure S3.** EIC of LC/MS data of acylated derivative from CEA reaction of **1**: (A) An acylated derivative of compound **1** in *S*-HBTM catalyzed acylation reaction; (B) An acylated derivative of compound **1** in *R*-HBTM catalyzed acylation reaction.

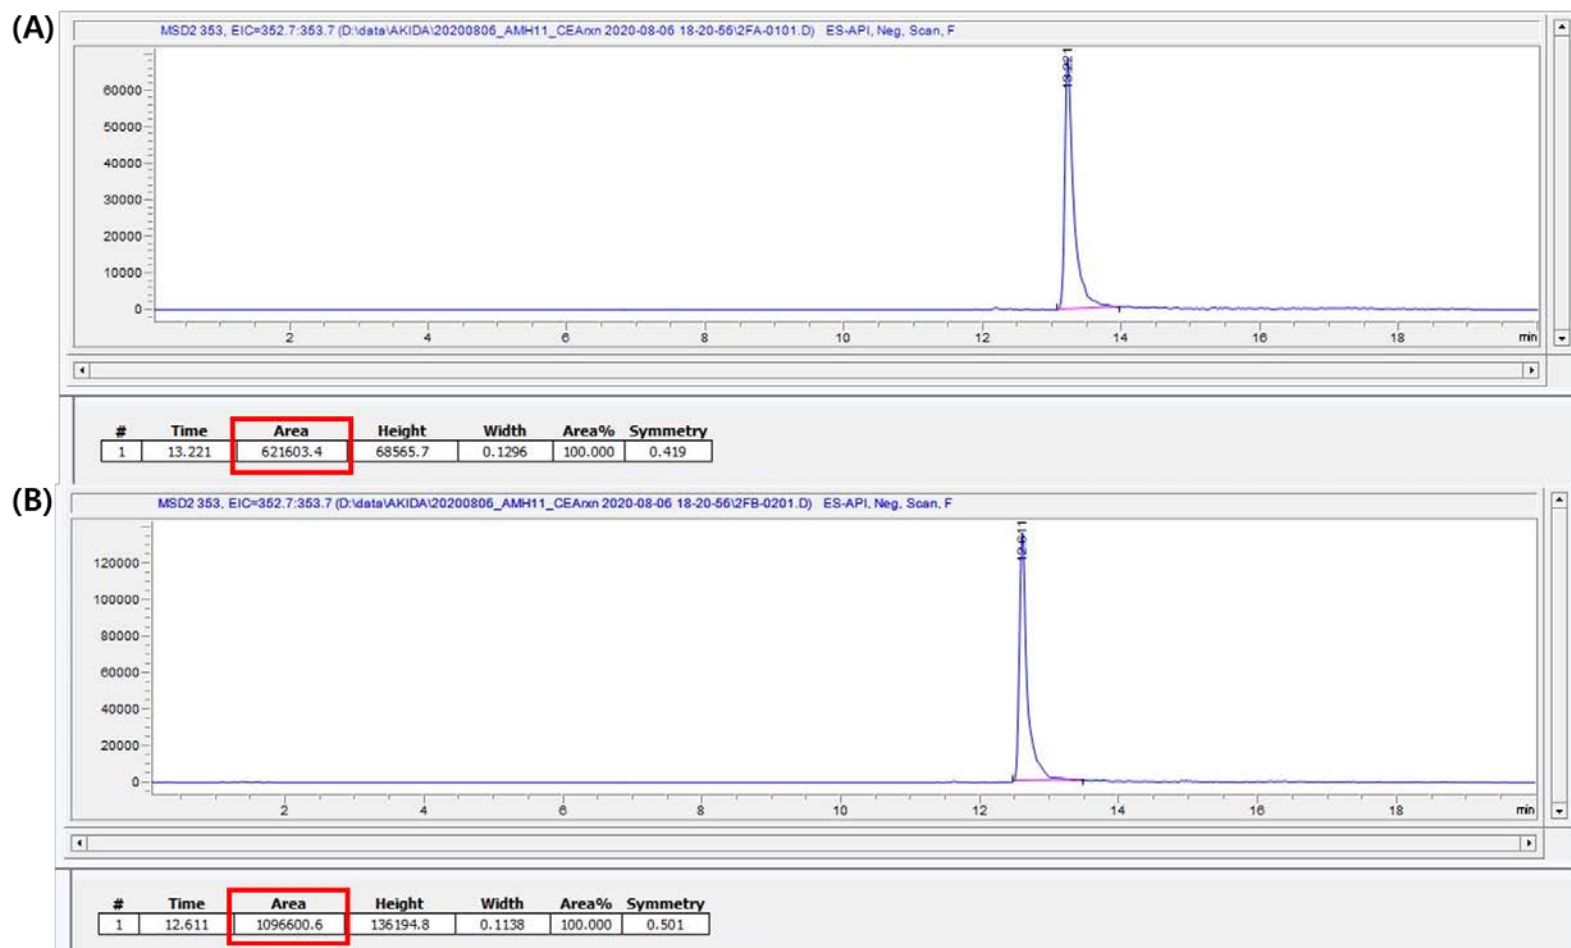

**Table S1.** HPLC chromatogram for the identification of compounds **1-10**.

| HPLC chromatograms                                                                                   | Solvent conditions           | Elution time |
|------------------------------------------------------------------------------------------------------|------------------------------|--------------|
| <b>Fr. A93</b><br>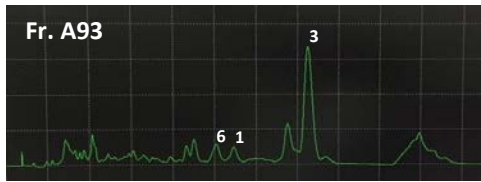  | MeCN/H <sub>2</sub> O, 58:42 | 62.0 min     |
| <b>Fr. A74</b><br>  | MeOH/H <sub>2</sub> O, 80:20 | 72.0 min     |
| <b>Fr. B5</b><br>   | MeCN/H <sub>2</sub> O, 68:32 | 82.0 min     |
| <b>Fr. A95</b><br> | MeCN/H <sub>2</sub> O, 68:32 | 82.0 min     |

**Table S2.** LC-MS identification of compounds **1-10**

| Compounds                                                                                                                                        | Retention time (min) | Maximum wavelength (nm) | Solvent elution condition for LC/MS<br>formic acid in H <sub>2</sub> O [0.1% (v/v)] (A) and<br>formic acid in MeOH (B)  | Molecular ion (M <sup>+</sup> ) | Fragmentation ions                    |
|--------------------------------------------------------------------------------------------------------------------------------------------------|----------------------|-------------------------|-------------------------------------------------------------------------------------------------------------------------|---------------------------------|---------------------------------------|
| 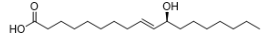<br>Amanitahemic acid A ( <b>1</b> )                            | 6.95                 | 204                     | gradient elution: 0–10.0 min, 70%–100% (B); 10.0–15.0 min, 100% (B); 15.0–16.0 min, 100–70% (B); 16.0–20.0 min, 70% (B) | 298                             | 59, 127, 141, 155, 251, 261, 279, 297 |
| <br>Methyl ester 10,13-dioxo-hexadecanoic acid ( <b>2</b> )     | 8.73                 | 202                     | gradient elution: 0–10.0 min, 70%–100% (B); 10.0–15.0 min, 100% (B); 15.0–16.0 min, 100–70% (B); 16.0–20.0 min, 70% (B) | 298                             | 244, 280                              |
| <br>(9E)-11-Oxo-9-octadecenoic acid ( <b>3</b> )                | 7.21                 | 228                     | gradient elution: 0–10.0 min, 70%–100% (B); 10.0–15.0 min, 100% (B); 15.0–16.0 min, 100–70% (B); 16.0–20.0 min, 70% (B) | 296                             | 169, 251, 279                         |
| <br>(9E)-Methyl ester 9-octadecenoic acid ( <b>4</b> )          | 8.86                 | 229                     | gradient elution: 0–10.0 min, 70%–100% (B); 10.0–15.0 min, 100% (B); 15.0–16.0 min, 100–70% (B); 16.0–20.0 min, 70% (B) | 310                             | 153, 211                              |
| <br>Oleic acid ( <b>5</b> )                                     | 11.24                | 202                     | gradient elution: 0–10.0 min, 70%–100% (B); 10.0–15.0 min, 100% (B); 15.0–16.0 min, 100–70% (B); 16.0–20.0 min, 70% (B) | 282                             | 55, 74, 97, 137, 180, 222, 264        |
| <br>Ricinoleic acid ( <b>6</b> )                                | 7.43                 | 202                     | gradient elution: 0–10.0 min, 70%–100% (B); 10.0–15.0 min, 100% (B); 15.0–16.0 min, 100–70% (B); 16.0–20.0 min, 70% (B) | 298                             | 83, 97, 111, 185, 263, 281            |
| <br>Palmitic acid ( <b>7</b> )                                  | 10.96                | 202                     | gradient elution: 0–10.0 min, 70%–100% (B); 10.0–15.0 min, 100% (B); 15.0–16.0 min, 100–70% (B); 16.0–20.0 min, 70% (B) | 256                             | 43, 73, 117, 129, 213                 |
| <br>(3β,22E)-3-Hydroxyergosta-5,8,22-trien-7-one ( <b>8</b> ) | 11.08                | 250                     | gradient elution: 0–10.0 min, 70%–100% (B); 10.0–15.0 min, 100% (B); 15.0–16.0 min, 100–70% (B); 16.0–20.0 min, 70% (B) | 410                             | 284                                   |
| <br>9,11-Dehydroergosterol peroxide ( <b>9</b> )              | 11.10                | 205                     | gradient elution: 0–10.0 min, 70%–100% (B); 10.0–15.0 min, 100% (B); 15.0–16.0 min, 100–70% (B); 16.0–20.0 min, 70% (B) | 426                             | 189, 303, 339, 356, 367, 409          |
| <br>Ergosterol peroxide ( <b>10</b> )                         | 11.53                | 203                     | gradient elution: 0–10.0 min, 70%–100% (B); 10.0–15.0 min, 100% (B); 15.0–16.0 min, 100–70% (B); 16.0–20.0 min, 70% (B) | 428                             | 191, 305, 341, 358, 369, 411          |

### *General experimental procedures*

Optical rotations were measured on a Jasco P-1020 polarimeter (Jasco, Easton, MD, USA). Infrared (IR) spectra were recorded on a Bruker IFS-66/S FT-IR spectrometer (Bruker, Karlsruhe, Germany). Ultraviolet (UV) spectra were acquired on an Agilent 8453 UV-visible spectrophotometer (Agilent Technologies, Santa Clara, CA). High-resolution (HR)-electrospray ionization (ESI) mass and tandem mass (MS/MS) spectra were recorded on an Agilent 1290 Infinity II series with 6545 LC/Q-TOF mass spectrometer (Agilent Technologies). NMR spectra were measured using a Bruker AVANCE III (Bruker). Preparative high-performance liquid chromatography (HPLC) was conducted using a Waters 1525 binary HPLC pump with Waters 996 photodiode array detector (Waters) and an Agilent Eclipse C<sub>18</sub> column (250 × 21.2 mm, 5 μm; flow rate: 5 mL/min) (Agilent Technologies), and semi-preparative HPLC used a Shimadzu Prominence HPLC System with SPD-20A/20AV Series Prominence HPLC UV-Vis Detectors (Shimadzu, Tokyo, Japan). LC/MS analysis was performed on an Agilent 1200 series HPLC system with a diode array detector and 6130 Series ESI mass spectrometer using an analytical Kinetex C<sub>18</sub> 100 Å column (100 mm × 2.1 mm i.d., 5 μm) (Phenomenex, Torrance, CA). Column chromatography used silica gel 60, 230–400 mesh (Merck, Darmstadt, Germany). Thin-layer chromatography (TLC) was conducted using precoated silica gel F<sub>254</sub> plates and reverse-phase (RP)-18 F<sub>254s</sub> plates (Merck). Spots on TLC were detected using UV and heating after dipping in anisaldehyde-sulfuric acid.



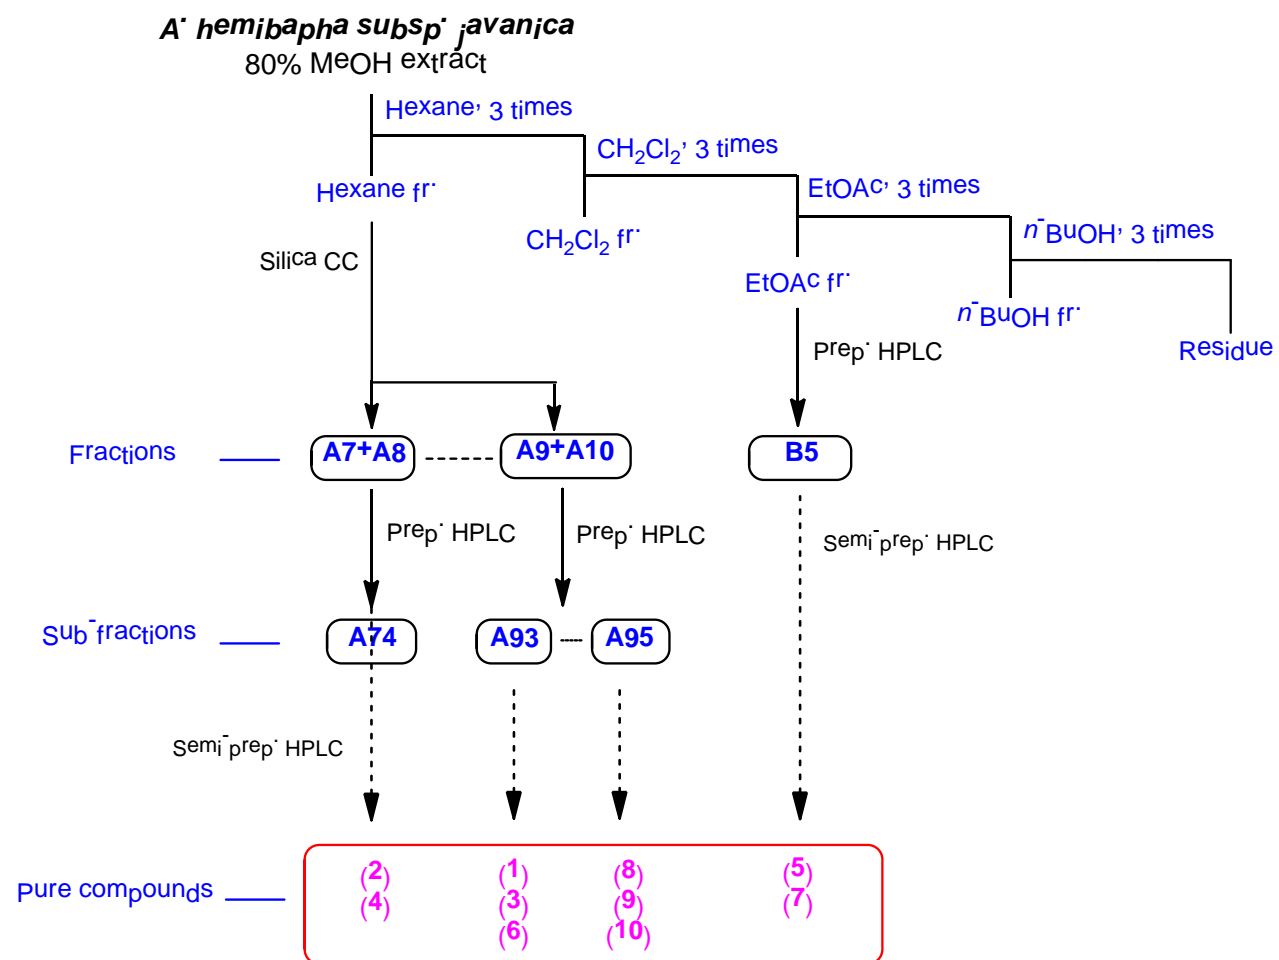

**Figure S4.** The separation scheme of compounds 1–10.

**Table S3.** Anti-*H. pyroli* activity of the MeOH extract and fractions derived from the solvent partitioning.

| Sample                   | Concentrations | Inhibition (%) |
|--------------------------|----------------|----------------|
| MeOH extract             |                | 0.0            |
| Hexane fraction          |                | 12.7           |
| Dichloromethane fraction | 100 µg/mL      | 7.1            |
| Ethyl acetate fraction   |                | 5.9            |
| <i>n</i> -BuOH fraction  |                | 2.0            |
